# Supplementary material
Source: publisher figshare collection journal article supplement (https://frontiersin.figshare.com/ndownloader/files/28086669)
Supplement: Supplementary file 1 [file 28086669]

Archive with 2 entries (1 files):
- movie_excitation/
- movie_excitation/excitation_full.mp4
